# Supplementary material
Source: PubMed Central journal article supplement (PMC5055472)
Supplement: NIHMS819902-supplement-supplement_1.pdf [file NIHMS819902-supplement-supplement_1.pdf]

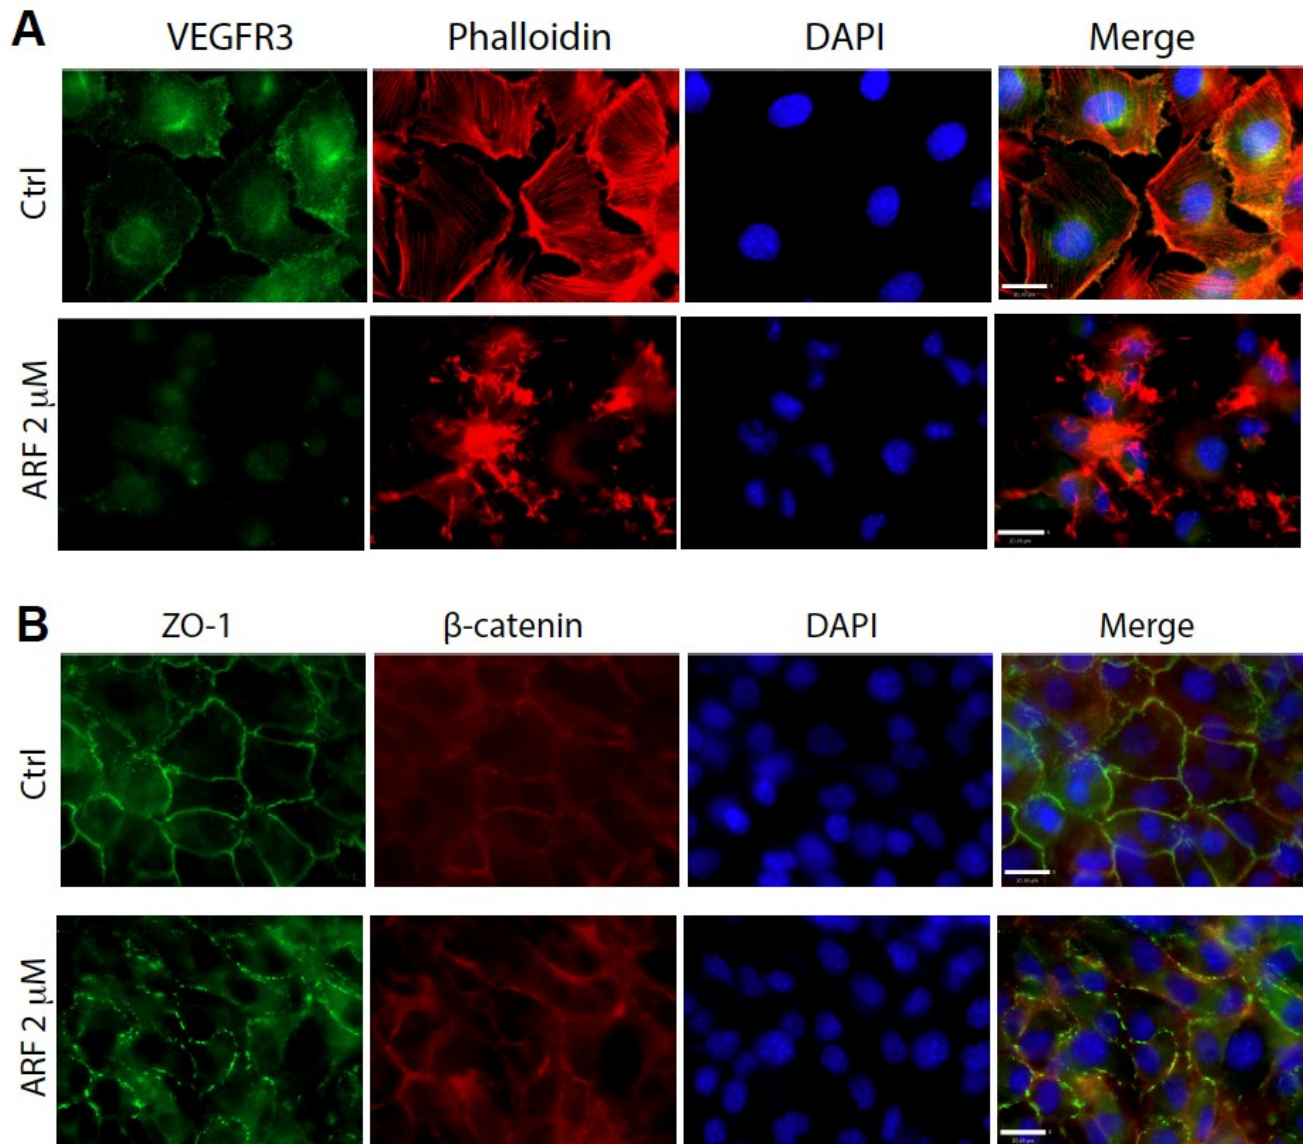

**Fig.S1. Auranofin at a high dose induces disruption of cytoskeleton and EC junctions.** SVEC were treated with ARF at 2  $\mu$ M for 4 h). Cells were subjected to immunofluorescence staining with indicated antibodies followed by Alexa Fluor 488 and 594-conjugated secondary antibodies. **A.** Anti-VEGFR3 and phalloidin staining. **B.** Anti-ZO-1 and anti- $\beta$ -catenin staining. Scale bar, 20  $\mu$ m.
